1 **Suicide Deaths during the Stay-at-Home Advisory in Massachusetts.**

2  
3 **Jeremy S. Faust, MD, MS, corresponding author**  
4 **Harvard Medical School, Brigham and Women’s Hospital Department of Emergency**  
5 **Medicine, Division of Health Policy and Public Health.**  
6 **Boston, MA**  
7 **jsfaust@gmail.com**

8  
9 **Sejal B. Shah, MD**  
10 **Harvard Medical School, Brigham and Women’s Hospital Department of Psychiatry**  
11 **Boston, MA**

12  
13 **Chengan Du, PhD**  
14 **Yale University School of Medicine, Yale New Haven Hospital, Center for Outcomes**  
15 **Research and Evaluation**  
16 **New Haven, CT**

17  
18 **Shu-Xia Li, PhD**  
19 **Yale New Haven Hospital, Center for Outcomes Research and Evaluation**  
20 **New Haven, CT**

21  
22 **Zhenqiu Lin, PhD**  
23 **Yale New Haven Hospital, Center for Outcomes Research and Evaluation**  
24 **New Haven, CT**

25  
26 **Harlan M. Krumholz MD, SM**  
27 **Yale University School of Medicine,**  
28 **Yale New Haven Hospital, Center for Outcomes Research and Evaluation**  
29 **New Haven, CT**

30  
31  
32  
33  
34  
35  
36  
37

38 **Abstract**

39 Many believe that shelter-in-place or stay-at-home policies might cause an increase in so-  
40 called deaths of despair. While increases in psychiatric stressors during the COVID-19  
41 pandemic are anticipated, whether suicide rates changed during stay-at-home periods has not  
42 been described.

43 This was an observational cohort study that assembled suicide death data for persons aged 10  
44 years or older from the Massachusetts Department of Health Registry of Vital Records and  
45 Statistics from January 2015 through May 2020. Using autoregressive integrated moving  
46 average (ARIMA) and seasonal ARIMA to analyze suicide deaths in Massachusetts, we  
47 compared the observed number of suicide deaths in Massachusetts during the stay-at-home  
48 period (March through May, 2020) in Massachusetts to the projected number of expected  
49 deaths. To be conservative, we also accounted for the deaths still pending final cause  
50 determination

51 The incident rate for suicide deaths in Massachusetts was 0.67 per 100,000 person-month (95%  
52 CI 0.56-0.79) versus 0.81 per 100,000 person-month (95% CI 0.69-0.94) during the 2019  
53 corresponding period (incident rate ratio of 0.83; 95% CI 0.66-1.03). The addition of the 57  
54 deaths pending cause determination occurring from March through May 2020 and the 33 cases  
55 still pending determination from the 2019 corresponding period did not change these findings.

56 The observed number of suicide deaths during the stay-at-home period did not deviate from  
57 ARIMA projected expectations using either preliminary data or an alternate scenario in which  
58 deaths pending investigation (exceeding the average remaining number of deaths still pending  
59 investigation which occurred during the corresponding 2015-2019 period) were ascribed to  
60 suicide. Decedent age and sex demographics were unchanged during the pandemic period  
61 compared to 2015-2019.

62 The stable rates of suicide deaths during the stay-at-home advisory in Massachusetts parallel  
63 findings following ecological disasters. As the pandemic persists, uncertainty about its scope  
64 and economic impact may increase. However, our data are reassuring that an increase in  
65 suicide deaths in Massachusetts during the stay-at-home advisory period did not occur.

66

67

68

69

70

71

72  
73  
74  
75  
76  
77  
78  
79  
80  
81  
82  
83  
84  
85  
86  
87  
88  
89  
90  
91  
92  
93  
94  
95  
96  
97  
98  
99  
100  
101  
102  
103  
104  
105  
106  
107  
108  
109  
110  
111  
112  
113

## Introduction

Many policymakers believe that shelter-in-place or stay-at-home policies might cause an increase in “deaths of despair”. While increases in psychiatric stressors during the COVID-19 pandemic are anticipated and have been reported, whether suicide rates changed during stay-at-home periods has not been described.<sup>1,2</sup>

## Methods

We assembled suicide death data for persons aged  $\geq 10$  years from the Massachusetts Department of Health Registry of Vital Records and Statistics from January 2015 through May 2020.

We used autoregressive integrated moving average (ARIMA) and seasonal ARIMA models to analyze suicide deaths in Massachusetts using yearly population as the covariate. We used the Akaike information criterion (AIC) to select the best model. We plotted suicide deaths during each month of 2020 for which adequate data exist (January through May). To be conservative, we plotted an alternative scenario in which the number of deaths pending investigation by the state medical examiner exceeding 2015-2019 corresponding monthly averages were ascribed to suicide. Incident rates and rate ratios for the pandemic period (March through May) and the corresponding period in 2019 were determined. STROBE guidelines were followed. This study was not subject to institutional review board approval because it used public data.

## Results

During the pandemic period, the incident rate for suicide deaths in Massachusetts was 0.67 per 100,000 person-month (95% CI 0.56-0.79) versus 0.81 per 100,000 person-month (95% CI 0.69-0.94) during the 2019 corresponding period (incident rate ratio of 0.83; 95% CI 0.66-1.03). Because data for 2019 and 2020 are “preliminary,” a sensitivity analysis including all deaths still pending final cause adjudication as of 10/14/2020 was performed. The addition of the 57 deaths pending cause determination occurring from March through May 2020 and the 33 cases still pending determination from the 2019 corresponding period did not change these findings. The conservative assumption that all pending investigations for March-May were suicides yielded an incident rate of 0.94 deaths (95% CI 0.81-1.08) per 100,000 person-month for 2020 and 0.97 deaths (95% CI 0.84-1.11) for 2019) per 100,000 person-month (incident rate ratio 0.97; 95% CI 0.80-1.18).

The number of suicide deaths during the stay-at-home period did not deviate from projected expectations using either preliminary data or an alternate scenario in which deaths pending investigation (exceeding the average remaining number of deaths still pending investigation which occurred during the corresponding 2015-2019 period) were ascribed to suicide (Figure). Decedent age and sex demographics were unchanged during the pandemic period, compared to 2015-2019. (Table).

114 **Discussion**

115 The stable rates of suicide deaths during the stay-at-home advisory in Massachusetts parallel  
116 findings following ecological disasters.<sup>3</sup> Early in the outbreak, social distancing-created  
117 stressors may have been offset by a sense of shared purpose in “flattening the curve.” There  
118 were efforts at bolstering connections through video platforms, anticipation about  
119 governmental support including unemployment benefits and stimulus aid, and mental health  
120 awareness campaigns about the risks of isolation, loneliness, and despair that could  
121 accompany the public health imperative of physical distancing.

122

123 One limitation to this study is its reliance on cause of death adjudication. However, unlike  
124 other causes of death, every suicide is investigated by a medical examiner, rendering resulting  
125 death certificates more reliable than many other causes.

126

127 As the pandemic persists, uncertainty about its scope and economic impact may increase.<sup>4</sup>  
128 Suicide risk often increases with rising unemployment and related strains, access to firearms,  
129 substance use, and interpersonal violence.<sup>5</sup> Decomensation of the seriously mentally ill may  
130 also contribute to related morbidity and mortality.

131

132 However, our data are reassuring that an increase in suicide deaths in Massachusetts during  
133 the stay-at-home advisory did not occur. Moving forward, effective prevention efforts will  
134 require comprehensive attention to the full spectrum of mental health services.

135

136

137 **Data Statement and Author Contributions:**

138 Dr. Faust had full access to all of the data in the study and takes responsibility for the integrity  
139 of the data and the accuracy of the data analysis.

140

141 *Concept and design:* Faust, Shah, Lin, Krumholz

142 *Acquisition, analysis, or interpretation of data:* Faust, Du, Li, Lin

143 *Drafting of the manuscript:* Faust, Shah, Du, Krumholz

144 *Critical revision of the manuscript for important intellectual content:* All authors.

145 *Statistical analysis:* Faust, Du, Li, Lin

146 *Supervision:* Faust, Lin, Krumholz

147

148 **Funding Statements:**

149 Faust: None.

150 Shah: None.

151 Du: None.

152 Li: None.

153 Lin: Dr Lin reported working under contract with the Centers for Medicare & Medicaid  
154 Services.

155 Krumholz: In the past three years, Harlan Krumholz received expenses and/or personal fees

156 from UnitedHealth, IBM Watson Health, Element Science, Aetna, Facebook, the Siegfried and

157 Jensen Law Firm, Arnold and Porter Law Firm, Martin/Baughman Law Firm, F-Prime, and the  
158 National Center for Cardiovascular Diseases in Beijing. He is an owner of Refactor Health and  
159 HugoHealth, and had grants and/or contracts from the Centers for Medicare & Medicaid  
160 Services, Medtronic, the U.S. Food and Drug Administration, Johnson & Johnson, and the  
161 Shenzhen Center for Health Information.  
162

## 163 **References**

- 164 1. Reger MA, Stanley IH, Joiner TE. Suicide Mortality and Coronavirus Disease 2019—A  
165 Perfect Storm? *JAMA Psychiatry*. Published online April 10, 2020.  
166 doi:10.1001/jamapsychiatry.2020.1060
- 167 2. Moutier C. Suicide Prevention in the COVID-19 Era: Transforming Threat Into Opportunity.  
168 *JAMA Psychiatry*. Published online October 16, 2020.  
169 doi:10.1001/jamapsychiatry.2020.3746
- 170 3. Morganstein JC, Ursano RJ. Ecological Disasters and Mental Health: Causes,  
171 Consequences, and Interventions. *Front Psychiatry*. 2020;11:1.  
172 doi:10.3389/fpsy.2020.00001
- 173 4. Phillips JA, Nugent CN. Suicide and the Great Recession of 2007-2009: the role of  
174 economic factors in the 50 U.S. states. *Soc Sci Med*. 2014;116:22-31.  
175 doi:10.1016/j.socscimed.2014.06.015
- 176 5. Gunnell D, Appleby L, Arensman E, et al. Suicide risk and prevention during the COVID-19  
177 pandemic. *The Lancet Psychiatry*. 2020;7(6):468-471. doi:10.1016/S2215-0366(20)30171-1

178

## 179 **Figure Legend:**

180 Suicide deaths in Massachusetts from January 2015 through May 2020.

181 *Black line*: raw suicide death counts.

182 *Green dots*: raw suicide deaths plus deaths pending investigation by the state medical  
183 examiner that are in excess of monthly averages of active pending investigations during the  
184 corresponding months from 2015-2019.

185 *Grey shaded area*: the projected range of suicide deaths expected to occur during 2020  
186 (seasonal adjusted model).

**Figure**

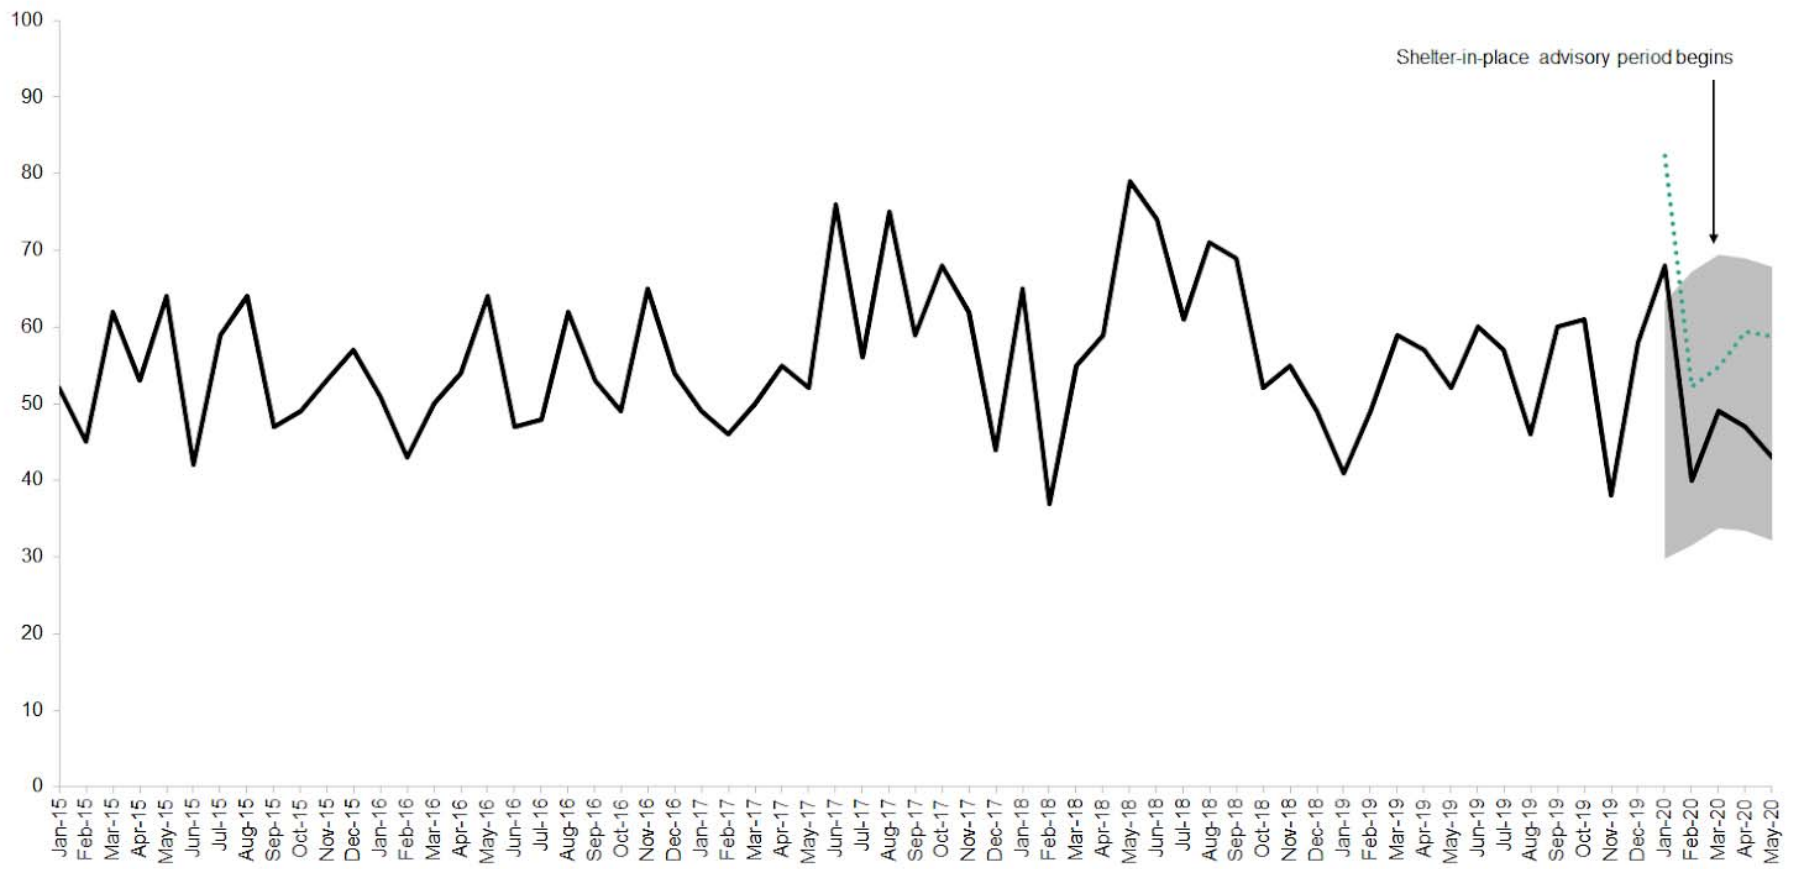

**Table**

|             | <b>Percent of<br/>deaths, female</b> | <b>Percent of<br/>deaths, male</b> | <b>Mean age,<br/>female</b> | <b>Mean<br/>age, male</b> | <b>Mean<br/>age, all</b> |
|-------------|--------------------------------------|------------------------------------|-----------------------------|---------------------------|--------------------------|
| <b>2015</b> | 24.4                                 | 75.6                               | 47.6                        | 47.5                      | 47.6                     |
| <b>2016</b> | 23.1                                 | 76.9                               | 47.5                        | 44.7                      | 45.3                     |
| <b>2017</b> | 24.2                                 | 75.8                               | 49.7                        | 44.1                      | 45.5                     |
| <b>2018</b> | 23.3                                 | 76.7                               | 46.3                        | 46.3                      | 46.3                     |
| <b>2019</b> | 22.3                                 | 77.7                               | 44.4                        | 50                        | 48.76                    |
| <b>2020</b> | 24.5                                 | 75.5                               | 44.7                        | 49.9                      | 48.6                     |
